# Supplementary material for: Identification of patients with type 2 diabetes with non-alcoholic fatty liver disease who are at increased risk of progressing to advanced fibrosis: a cross-sectional study
Source: PubMed Central journal article supplement — BMJ Open. 2023 Jan 13;13(1):e063959. doi: 10.1136/bmjopen-2022-063959 (PMC9843224; doi:10.1136/bmjopen-2022-063959), 2023-01-13
Supplement: bmjopen-2022-063959.draft_revisions.pdf [file bmjopen-2022-063959.draft_revisions.pdf]

# BMJ Open

BMJ Open is committed to open peer review. As part of this commitment we make the peer review history of every article we publish publicly available.

When an article is published we post the peer reviewers' comments and the authors' responses online. We also post the versions of the paper that were used during peer review. These are the versions that the peer review comments apply to.

The versions of the paper that follow are the versions that were submitted during the peer review process. They are not the versions of record or the final published versions. They should not be cited or distributed as the published version of this manuscript.

BMJ Open is an open access journal and the full, final, typeset and author-corrected version of record of the manuscript is available on our site with no access controls, subscription charges or pay-per-view fees (<http://bmjopen.bmj.com>).

If you have any questions on BMJ Open's open peer review process please email [info.bmjopen@bmj.com](mailto:info.bmjopen@bmj.com)

# BMJ Open

## Identification of type 2 diabetics with non-alcoholic fatty liver disease who are at increased risk of progressing to advanced fibrosis: A cross-sectional study

|                               |                                                                                                                                                                                                                                                                                                                                                                                                                                                                                                                                                                                                                                                                                                                                                                                                                                                                                                               |
|-------------------------------|---------------------------------------------------------------------------------------------------------------------------------------------------------------------------------------------------------------------------------------------------------------------------------------------------------------------------------------------------------------------------------------------------------------------------------------------------------------------------------------------------------------------------------------------------------------------------------------------------------------------------------------------------------------------------------------------------------------------------------------------------------------------------------------------------------------------------------------------------------------------------------------------------------------|
| Journal:                      | <i>BMJ Open</i>                                                                                                                                                                                                                                                                                                                                                                                                                                                                                                                                                                                                                                                                                                                                                                                                                                                                                               |
| Manuscript ID                 | bmjopen-2022-063959                                                                                                                                                                                                                                                                                                                                                                                                                                                                                                                                                                                                                                                                                                                                                                                                                                                                                           |
| Article Type:                 | Protocol                                                                                                                                                                                                                                                                                                                                                                                                                                                                                                                                                                                                                                                                                                                                                                                                                                                                                                      |
| Date Submitted by the Author: | 19-May-2022                                                                                                                                                                                                                                                                                                                                                                                                                                                                                                                                                                                                                                                                                                                                                                                                                                                                                                   |
| Complete List of Authors:     | Mettananda, Chamila; University of Kelaniya, Department of Pharmacology<br>Egodage, Thimira; University of Kelaniya Faculty of Medicine, Department of Pharmacology, Clinical Trials Unit<br>Dantanarayana, Channaka; University of Kelaniya Faculty of Medicine, Department of Pharmacology, Clinical Trials Unit<br>Fernando, Rumal; Noth Colombo Teaching Hospital<br>Ranaweera, Lakmali; Noth Colombo Teaching Hospital<br>Luke, Nathasha; University of Kelaniya, Department of Pharmacology<br>Ranawaka, Chamila; Noth Colombo Teaching Hospital<br>Kottahachchi, Dulani; University of Kelaniya Faculty of Medicine, Department of Physiology<br>Pathmeswaran, Arunasalam; University of Kelaniya Faculty of Medicine, Public Health<br>de Silva, Hithanadura; University of Kelaniya Faculty of Medicine, Medicine<br>Dassanayake, Anuradha; University of Kelaniya Faculty of Medicine, Pharmacology |
| Keywords:                     | Hepatology < INTERNAL MEDICINE, Other metabolic, e.g. iron, porphyria < DIABETES & ENDOCRINOLOGY, Gastroenterology < INTERNAL MEDICINE                                                                                                                                                                                                                                                                                                                                                                                                                                                                                                                                                                                                                                                                                                                                                                        |
|                               |                                                                                                                                                                                                                                                                                                                                                                                                                                                                                                                                                                                                                                                                                                                                                                                                                                                                                                               |

SCHOLARONE™  
Manuscripts

## Title Page

**Title of the article** - Identification of type 2 diabetics with non-alcoholic fatty liver disease who are at increased risk of progressing to advanced fibrosis: A cross-sectional study

### Full name, postal address and e-mail of the corresponding author –

Chamila Mettananda

Department of Pharmacology, Faculty of Medicine, University of Kelaniya, Ragama, Sri Lanka

[chamila@kln.ac.lk](mailto:chamila@kln.ac.lk)

### Full name, department, institution, city and country of all co-authors

- Chamila Mettananda, Department of Pharmacology, University of Kelaniya, Ragama, Sri Lanka
- Thimira Egodage, Department of Pharmacology, University of Kelaniya, Ragama, Sri Lanka
- Channaka Dantanarayana, Department of Pharmacology, University of Kelaniya, Ragama, Sri Lanka
- Rumal Fernando, North Colombo Teaching Hospital, Ragama, Sri Lanka
- Lakmali Ranaweera, North Colombo Teaching Hospital, Ragama, Sri Lanka
- Nathasha Luke, Department of Pharmacology, University of Kelaniya, Ragama, Sri Lanka
- Chamila Ranawaka, North Colombo Teaching Hospital, Ragama, Sri Lanka
- Dulani Kottahachchi, Department of Physiology, University of Kelaniya, Ragama, Sri Lanka
- Arunasalam Pathmeswaran, Department of Public Health, University of Kelaniya, Ragama, Sri Lanka
- Janaka de Silva, Department of Medicine, University of Kelaniya, Ragama, Sri Lanka
- Anuradha Dassanayake, Department of Pharmacology, University of Kelaniya, Ragama, Sri Lanka

### Word count, excluding title page, abstract, references, figures and tables

1986

1  
2  
3  
4  
5  
6  
7  
8  
9 **Abstract:**

10  
11  
12 **Introduction;**

13  
14 Identification of advanced hepatic fibrosis in non-alcoholic fatty liver disease (NAFLD) is  
15 important as this may progress to cirrhosis and hepatocellular carcinoma. The risk of  
16 hepatic fibrosis is especially high among diabetics with NAFLD. Annual screening of  
17 hepatic fibrosis is especially high among diabetics with NAFLD. Annual screening of  
18 diabetics for fatty liver and significant fibrosis with calculation of FIB-4 score and vibration  
19 controlled transient elastography (VCTE) has been recommended. However, VCTE is  
20 expensive and may not be freely available in resource-limited settings. We aim to identify  
21 predictors of significant liver fibrosis and to develop a prediction model to prioritize referral  
22 of diabetic patients with NAFLD for VCTE.  
23  
24  
25  
26  
27  
28  
29

30 **Methods and analysis;**

31 This cross-sectional study will be conducted among all consenting adults with T2DM with  
32 NAFLD at the Colombo North Teaching Hospital, Ragama, Sri Lanka. All patients will have  
33 the FIB-4 score calculated. Those with FIB-4  $\geq 1.3$  will undergo VCTE (with FibroScan® by  
34 Echosens). Risk associations for progression to advanced liver fibrosis/cirrhosis will be  
35 identified by comparing patients with significant fibrosis (LSM  $\geq 8$  kPa) and without  
36 significant fibrosis (FIB-4  $< 1.3$ ). A model to predict significant liver fibrosis will be developed  
37 using logistic regression.  
38  
39  
40  
41  
42  
43  
44

45 **Ethics and dissemination.** Ethical approval has been obtained from the Ethics Committee  
46 of the Faculty of Medicine, University of Kelaniya (P/66/07/2021). Results of the study will  
47 be disseminated as scientific publications in reputed journals.  
48  
49  
50

51  
52 **Keywords:** Nonalcoholic Fatty liver disease, NAFLD, Diabetes mellitus, Prediction,  
53 significant liver fibrosis, cross-sectional study, vibration controlled transient elastography  
54  
55  
56  
57  
58  
59  
60

## Article Summary

### Strengths and limitations of this study

- We will evaluate freely available lifestyle, clinical and biochemical/haematological characteristics and FIB-4 score to identify diabetics with NAFLD at high risk of developing advanced liver fibrosis/cirrhosis.
- We plan to develop a simple, cost-effective, specific, and practical model to identify the patients at risk of developing advanced liver fibrosis /cirrhosis with more utility than the FIB-4 score to prioritize patients who need transient elastography and referral to a hepatologist.
- The new model will be user-friendly and suited for low-resource settings where VCTE is not freely available.
- As this is a cross-sectional study, the limitation will be the lack of long-term follow-up data.

## Main text

### Introduction

---

Non-alcoholic fatty liver disease (NAFLD) is the most common liver disease in the world with a global prevalence of 25%, with the highest rates in the Middle East and South America and the lowest in Africa (1-3). NAFLD is a spectrum ranging from simple steatosis, nonalcoholic steatohepatitis (NASH) to cirrhosis (Figure 1)(4). NASH is strongly associated with liver fibrosis and is defined histologically on a scale ranging from F0 to F4. Stages F0 to F1 have no or minimal fibrosis, F2 is significant fibrosis with risk of progressive NASH, F3 is advanced fibrosis and F4 cirrhosis (Figure 2) (5). Fibrosis of the liver can be measured non-invasively with vibration controlled transient elastography (VCTE) with FibroScan® by Echosens which measures liver stiffness. A liver stiffness measure (LSM) between 2. -7 kPa is suggestive of absent or mild fibrosis while LSM above 12.5 kPa, is suggestive of cirrhosis.

NAFLD is a dynamic condition that can regress to simple steatosis with liver-directed therapy, smoulder at a relatively constant level of activity, or cause progressive fibrosis and lead to cirrhosis. However, the majority of NAFLD patients have a benign course and only 10% develop progressive fibrosis leading to cirrhosis and hepatocellular carcinoma (HCC) (6, 7). There is no widely accepted pharmacological treatment for established cirrhosis and the only curative treatment is liver transplantation. However, progressive NASH and its complications such as cirrhosis could be delayed or prevented if people with increased risk of progressive fibrosis are detected early in the course of the disease (at F2-3 stage or LSM  $\geq$ 8 kPa) and liver-directed therapies are initiated. This is the key to reducing the liver-related burden of NAFLD in both high- and low-income countries (8).

*Figure 1*

*Figure 2*

1  
2  
3  
4  
5  
6 NAFLD is the hepatic manifestation of insulin resistance, which is the hallmark of type 2  
7 diabetes mellitus (T2DM) (9). It is three times more prevalent among diabetics than in the  
8 general population (10). Globally, 55.5% of patients with T2DM and 62% of Asians with T2DM  
9 have NAFLD (11) (12). On the other hand, NAFLD is considered a risk factor for T2DM (13,  
10 14), and NAFLD patients have a two-fold increased risk of developing T2DM compared to  
11 those without NAFLD (15). Diabetes is independently associated with the degree of steatosis,  
12 NAFLD progression to NASH, advanced fibrosis, and the development of HCC (16-19). The  
13 progression of NAFLD to advanced fibrosis is two times higher among diabetics than in the  
14 general population. Around 20% of T2DM patients with NAFLD progress to advanced liver  
15 fibrosis over a mean of 5.9 years (9)(20). Therefore, both the American Diabetes  
16 Association(2020) (21) and the European Association for the Study of the Liver(2016) (22)  
17 recommend screening of all T2DM patients for NAFLD to prevent liver-related complications  
18 of NAFLD. There are two proposed algorithms for screening diabetic patients for NAFLD,  
19 and both propose annual screening of diabetics with NAFLD but using two different screening  
20 tools; one using the Fibrosis-4 score (FIB-4) (23, 24) and the other using the NAFLD fibrosis  
21 score (NFS)(25, 26). The proposed algorithm involves two steps. The first is an annual  
22 screening of diabetics with NAFLD and the second step is liver stiffness measurement (LSM)  
23 using transient elastography (25) for those with FIB-4  $\geq 1.3$  (24) or NFS between -1.455 to  
24 0.676 (25). The patients at high risk of advanced fibrosis/cirrhosis with an LSM  $\geq 8$  kPa are  
25 advised referral to specialized liver centres for further assessment and management (24, 27)  
26 (28).  
27  
28  
29  
30  
31  
32  
33  
34  
35  
36  
37  
38  
39  
40  
41  
42

43 Diabetes has become an epidemic in low-middle-income countries including those in Asia.  
44 Of the world's diabetic population, 60% are Asian (29). Diabetes is on the rise among  
45 Asians due to urbanization, changing to Western lifestyles and dietary habits in addition to  
46 a relatively high genetic predisposition (30, 31). Asians are at higher risk of developing  
47 T2DM compared with people of European ancestry with genetic predisposition through  
48 PNPLA3 SNPs and polymorphisms in apolipoprotein (29). However, VCTE is expensive  
49 and is not freely available for all diabetics in low-middle income countries.  
50  
51  
52  
53  
54  
55  
56  
57  
58  
59  
60

1  
2 Therefore, we aimed to identify clinical predictors of NASH (i.e.: LSM  $\geq$ 8 kPa) (28)) in type  
3  
4 2 diabetics who are at risk of progression to advanced liver fibrosis and cirrhosis, and  
5  
6 develop a model to identify patients at high risk of progression to advanced fibrosis. This  
7  
8 we hope will help to guide clinicians in primary and secondary care in resource-poor  
9  
10 settings to prioritize referrals for VCTE and to specialized liver centres.

## 11 12 **Methods and analysis**

---

### 13 14 **Study design and setting**

15  
16 This study is an ongoing cross-sectional study to identify diabetics with NAFLD who are at  
17  
18 risk of progression to advanced liver fibrosis and/or cirrhosis. We compare the risk  
19  
20 associations of patients with advanced liver fibrosis diagnosed by an LSM  $\geq$ 8 kPa by  
21  
22 transient elastography and patients with no or minimal liver fibrosis diagnosed by FIB-4  
23  
24 score  $<$ 1.3. The study is being conducted at the Colombo North Teaching Hospital,  
25  
26 Ragama, Sri Lanka.

### 27 28 **Study objectives**

29  
30 To identify diabetics with NAFLD who are at increased risk of progression to advanced liver  
31  
32 fibrosis/cirrhosis and to develop a prediction model for the same. We further plan to  
33  
34 validate the FIB-4 score among Sri Lankans.

### 35 36 37 **Study population and eligibility criteria**

38  
39 All adult patients with T2DM attending Medical/Diabetes Clinics of three Consultants at  
40  
41 three private sector hospitals of the Gampaha District of Sri Lanka over 12 consecutive  
42  
43 months who have ultrasonographic evidence of NAFLD will be the study population.

### 44 45 **Inclusion criteria**

- 46  
47 • Patients with confirmed T2DM
- 48  
49 • Patients who are aged over 18 years
- 50  
51 • Patients who have ultrasonic (US) evidence of fatty liver in a US scan done within the  
52  
53 previous 3 months of recruitment
- 54  
55  
56  
57  
58  
59  
60



### **Exclusion criteria**

- Patients without consent
- Patients with established cirrhosis on US scan
- Males consuming alcohol > 14 units/week and females consuming alcohol > 7 units/week
- Evidence of Hepatitis B or C infection
- Patients with diagnosed liver diseases of known aetiology other than NAFLD
- Patients on medications known to cause fatty liver or liver fibrosis e.g., tamoxifen, methotrexate etc.

### **Sample size**

The sample size was calculated for developing a clinical prediction model (32, 33) assuming an R-squared value of 0.2 for the logistic model, 10 parameters in the model, and 0.05 acceptable difference in apparent & adjusted R-squared, 0.05 margin of error in the estimation of intercept and an anticipated prevalence of advanced liver fibrosis of 15% among T2DM with NAFLD (Events per Predictor Parameter (EPP) (9).

The calculated minimum sample size is 398 patients with T2DM with NAFLD (among whom 60 are expected to have significant fibrosis, i.e.: LSM  $\geq$ 8 kPa).

### **Patient recruitment -**

Consecutive adult patients (>18 years) with T2DM attending Medical/Diabetes Clinics of three Consultants at three private sector hospitals of the Gampaha District of Sri Lanka over 12 consecutive months starting from November 2021 are being screened and the eligible patients are recruited to this study after being referred to the Gastroenterology and Hepatology clinic of the Colombo North Teaching Hospital Ragama until the sample size is achieved (Figure 3). All eligible patients are given a patient information sheet to read and time to clarify doubts with investigators before consenting. The participants will be informed about the study including the data collection procedure and that a subgroup of participants will undergo a non-invasive VCTE of the liver free of charge. The patients will be made aware of the ability to withdraw consent at any point without having to give reasons. Informed written consent from all participants will be obtained before recruiting into the study. Permission has been obtained from the director of the North Colombo Teaching

1  
2 Hospital and the consultant in charge of the Diabetic and Endocrine clinics to carry out the  
3  
4 study.  
5  
6  
7

### 8 9 Figure 3 10 11 12 13 14 15

#### 16 Study procedure

17 Patients with diabetes mellitus and complying with inclusion and exclusion criteria will be  
18 interviewed and medical records will be assessed. Data will be collected using an  
19 interviewer-administered questionnaire. Information on demography, history of metabolic  
20 risk factors, medications, diet, and exercise will be recorded. Haematological and  
21 biochemical investigations done within 3 months before recruitment will be extracted from  
22 clinic records. Anthropometry: height, weight and waist circumference will be measured at  
23 recruitment. FIB-4 score will be calculated for all patients using age, sex, and the most  
24 recent AST, ALT and platelet count done within 3 months of recruitment to the study. All  
25 patients with a FIB-4 score  $\geq 1.3$  will undergo VCTE of the liver free of charge by a single,  
26 trained medical officer. LSM and CAP measures will be recorded. A subset of patients with  
27 a FIB-4 score  $< 1.3$  will also undergo VCTE to confirm the validity of the FIB-4 score to  
28 exclude significant liver fibrosis.  
29  
30  
31  
32  
33  
34  
35  
36  
37  
38  
39

#### 40 Statistical analysis

41 IBM SPSS 22.0 software will be used for data management and analyses. Multiple logistic  
42 regression will be used to identify factors associated with significant liver fibrosis. A model  
43 will be developed using the identified risk factors to predict “significant liver fibrosis”  
44 according to their weighted scores ( $\beta$ -coefficient). Cut-off points and the sensitivity and  
45 specificity of predictions will be determined using ROC curves. The predictions of the new  
46 model will be compared with the predictions of the simple FIB-4 score.  
47  
48  
49  
50  
51  
52  
53

#### 54 Data management and monitoring

55 All completed questionnaires and VCTE reports will be stored securely. An electronic  
56 screening log and database will be maintained as a password-protected file.  
57  
58  
59  
60

### Ethical considerations

This is not an interventional study and is associated with no risks to the patients. Selected patients will undergo non-invasive VCTE of the liver free of charge. There are no risks associated with this scan. The results of the scan will only be divulged to the treating physician of the patients for initiation of relevant treatment options. The findings of the study could be beneficial to all diabetics in the early diagnosis/prediction of significant liver fibrosis in individuals. Participants will have the right to withdraw from the study at any point without providing explanations. Ethical approval for the study has been obtained from the Ethics Committee of the Faculty of Medicine, University of Kelaniya, Sri Lanka (Ref. P/66/07/2021).

### Termination of the study

The study will be terminated if:

- A new and cost-effective tool to predict significant liver fibrosis that changes current guidelines become available.
- Significant violation of good clinical practice that compromises the ability to achieve study objectives or compromises subject safety occurs.

### Study status

The trial commenced in November 2021 according to the protocol version 2.0, 06 August 2021 and is currently open for recruitment. We have recruited 220 patients for the study so far.

### Patient and public involvement

Reports of the VCTE (LSM) done as part of the trial will be available to all participants who request it and will be used in the standard management when required. All patients are given a health education leaflet on Fatty Liver and secondary prevention. Results of the VCTE are notified to the treating physician for necessary action. The results of the study will be disseminated to study participants and other patients with diabetes and fatty liver using patient education leaflets and lectures after completion of the study.

## Discussion

---

In this study, we aim to develop a practical, cost-effective model to predict diabetics with NAFLD who are at increased risk of progressing to advanced liver fibrosis and/or cirrhosis to target those that require transient elastography. Furthermore, even though there are non-invasive markers of liver fibrosis such as FIB-4 (23), BRAD (34), and NFS (26), none of these has been developed specifically for diabetics and has been validated in Asian except among Japanese (35).

Apart from a few studies from North India (36) and Vietnam (37), there are no reports of VCTE data in diabetics from Asia. There is no data on VCTE from Sri Lanka. Furthermore, the FIB-4 score has not been validated among Sri Lankans. Through our study, we hope to provide a low-cost, practical model to identify the patients with type 2 diabetes and NAFLD who are at increased risk of progression to advanced fibrosis/cirrhosis.

## Limitations

---

Liver biopsy is the gold standard for staging liver fibrosis but in our study, VCTE will be used to diagnose significant liver fibrosis (38). However, liver biopsy is an invasive procedure and current practice guidelines recommend VCTE as a surrogate to exclude advanced fibrosis, with liver biopsy reserved for those with equivocal VCTE results (24, 25).

**Author Contributions:** CM conceived the study. CM,TE, CD, RF,NL, LR, CR, DK, AP JdeS and AD contributed to the study design. CM drafted the manuscript and AD, and JdeS significantly edited the manuscript. All authors assisted in developing the protocol and have read, reviewed, edited, and approved the final manuscript.

**Funding:** This research received no specific grant from any funding agency in the public, commercial or not-for-profit sectors

**Competing interests:** None declared.

**Patient consent for publication:** Not required.

**Data statement** : Technical appendix, statistical code, and dataset available from the corresponding author on a valid request

**Provenance and peer review**: Not commissioned

**Acknowledgement** : Jayani Manchanayake and Dileepa Ediriweera for helping in developing the protocol.

## References

1. Ekstedt M, Hagström H, Nasr P, Fredrikson M, Stål P, Kechagias S, et al. Fibrosis stage is the strongest predictor for disease-specific mortality in NAFLD after up to 33 years of follow-up. *Hepatology*. 2015;61(5):1547-54.
2. Younossi ZM, Koenig AB, Abdelatif D, Fazel Y, Henry L, Wymer M. Global epidemiology of nonalcoholic fatty liver disease-Meta-analytic assessment of prevalence, incidence, and outcomes. *Hepatology*. 2016;64(1):73-84.
3. Amarapurkar DN, Hashimoto E, Lesmana LA, Sollano JD, Chen PJ, Goh KL. How common is non-alcoholic fatty liver disease in the Asia-Pacific region and are there local differences? *Journal of gastroenterology and hepatology*. 2007;22(6):788-93.
4. Diehl AM, Day C. Cause, Pathogenesis, and Treatment of Nonalcoholic Steatohepatitis. *N Engl J Med*. 2017;377(21):2063-72.
5. Castera L, Forns X, Alberti A. Non-invasive evaluation of liver fibrosis using transient elastography. *J Hepatol*. 2008;48(5):835-47.
6. Brunt EM, Janney CG, Di Bisceglie AM, Neuschwander-Tetri BA, Bacon BR. Nonalcoholic steatohepatitis: a proposal for grading and staging the histological lesions. *Am J Gastroenterol*. 1999;94(9):2467-74.
7. Diehl AM, Day C. Cause, Pathogenesis, and Treatment of Nonalcoholic Steatohepatitis. *New England Journal of Medicine*. 2017;377(21):2063-72.
8. Eslam M, Sanyal AJ, George J. MAFLD: A Consensus-Driven Proposed Nomenclature for Metabolic Associated Fatty Liver Disease. *Gastroenterology*. 2020;158(7):1999-2014.e1.
9. Alkhoury N, Poordad F, Lawitz E. Management of nonalcoholic fatty liver disease: Lessons learned from type 2 diabetes. *Hepatology Communications*. 2018;2(7):778-85.
10. Saponaro C, Gaggini M, Gastaldelli A. Nonalcoholic fatty liver disease and type 2 diabetes: common pathophysiologic mechanisms. *Curr Diab Rep*. 2015;15(6):607.
11. Younossi ZM, Golabi P, de Avila L, Paik JM, Srishord M, Fukui N, et al. The global epidemiology of NAFLD and NASH in patients with type 2 diabetes: A systematic review and meta-analysis. *J Hepatol*. 2019;71(4):793-801.

12. Herath HMM, Kodikara I, Weeraratna TP, Liyanage G. Prevalence and associations of non-alcoholic fatty liver disease (NAFLD) in Sri Lankan patients with type 2 diabetes: A single center study. *Diabetes Metab Syndr*. 2019;13(1):246-50.
13. Adams LA, Waters OR, Knudman MW, Elliott RR, Olynyk JK. NAFLD as a risk factor for the development of diabetes and the metabolic syndrome: an eleven-year follow-up study. *Am J Gastroenterol*. 2009;104(4):861-7.
14. Shibata M, Kihara Y, Taguchi M, Tashiro M, Otsuki M. Nonalcoholic Fatty Liver Disease Is a Risk Factor for Type 2 Diabetes in Middle-Aged Japanese Men. *Diabetes Care*. 2007;30(11):2940-4.
15. Kasturiratne A, Weerasinghe S, Dassanayake AS, Rajindrajith S, de Silva AP, Kato N, et al. Influence of non-alcoholic fatty liver disease on the development of diabetes mellitus. *Journal of gastroenterology and hepatology*. 2013;28(1):142-7.
16. Hossain N, Afendy A, Stepanova M, Nader F, Srishord M, Rafiq N, et al. Independent predictors of fibrosis in patients with nonalcoholic fatty liver disease. *Clin Gastroenterol Hepatol*. 2009;7(11):1224-9, 9.e1-2.
17. Vernon G, Baranova A, Younossi ZM. Systematic review: the epidemiology and natural history of non-alcoholic fatty liver disease and non-alcoholic steatohepatitis in adults. *Aliment Pharmacol Ther*. 2011;34(3):274-85.
18. Loomba R, Abraham M, Unalp A, Wilson L, Lavine J, Doo E, et al. Association between diabetes, family history of diabetes, and risk of nonalcoholic steatohepatitis and fibrosis. *Hepatology*. 2012;56(3):943-51.
19. Fracanzani AL, Valenti L, Bugianesi E, Andreoletti M, Colli A, Vanni E, et al. Risk of severe liver disease in nonalcoholic fatty liver disease with normal aminotransferase levels: a role for insulin resistance and diabetes. *Hepatology*. 2008;48(3):792-8.
20. Singh S, Allen AM, Wang Z, Prokop LJ, Murad MH, Loomba R. Fibrosis progression in nonalcoholic fatty liver vs nonalcoholic steatohepatitis: a systematic review and meta-analysis of paired-biopsy studies. *Clin Gastroenterol Hepatol*. 2015;13(4):643-54.e1-9; quiz e39-40.
21. Association AD. 4. Comprehensive Medical Evaluation and Assessment of Comorbidities: Standards of Medical Care in Diabetes—2020. *Diabetes Care*. 2019;43(Supplement\_1):S37-S47.
22. EASL-EASD-EASO Clinical Practice Guidelines for the management of non-alcoholic fatty liver disease. *J Hepatol*. 2016;64(6):1388-402.
23. Shah AG, Lydecker A, Murray K, Tetri BN, Contos MJ, Sanyal AJ. Comparison of noninvasive markers of fibrosis in patients with nonalcoholic fatty liver disease. *Clin Gastroenterol Hepatol*. 2009;7(10):1104-12.
24. Vieira Barbosa J, Lai M. Nonalcoholic Fatty Liver Disease Screening in Type 2 Diabetes Mellitus Patients in the Primary Care Setting. *Hepatology Communications*. 2021;5(2):158-67.
25. Castera L, Vilgrain V, Angulo P. Noninvasive evaluation of NAFLD. *Nature Reviews Gastroenterology & Hepatology*. 2013;10(11):666-75.
26. Angulo P, Hui JM, Marchesini G, Bugianesi E, George J, Farrell GC, et al. The NAFLD fibrosis score: a noninvasive system that identifies liver fibrosis in patients with NAFLD. *Hepatology*. 2007;45(4):846-54.
27. Petroni ML, Brodosi L, Bugianesi E, Marchesini G. Management of non-alcoholic fatty liver disease. *BMJ (Clinical research ed)*. 2021;372:m4747.
28. Li Q, Huang C, Xu W, Hu Q, Chen L. Accuracy of FibroScan in analysis of liver fibrosis in patients with concomitant chronic Hepatitis B and nonalcoholic fatty liver disease. *Medicine*. 2020;99(23).

- 1  
2 29. Chan JCN, Malik V, Jia W, Kadowaki T, Yajnik CS, Yoon K-H, et al. Diabetes in  
3 Asia: Epidemiology, Risk Factors, and Pathophysiology. *Jama*. 2009;301(20):2129-40.  
4 30. Dassanayake AS. Nonalcoholic Fatty Liver Disease: Identifying the Disease Burden  
5 in Sri Lanka. *Euroasian J Hepatogastroenterol*. 2018;8(1):69-72.  
6 31. Niriella MA, Pathmeswaran A, De Silva ST, Kasturiratna A, Perera R, Subasinghe  
7 CE, et al. Incidence and risk factors for non-alcoholic fatty liver disease: A 7-year follow-up  
8 study among urban, adult Sri Lankans. *Liver Int*. 2017;37(11):1715-22.  
9 32. Riley RD, Ensor J, Snell KIE, Harrell FE, Jr., Martin GP, Reitsma JB, et al.  
10 Calculating the sample size required for developing a clinical prediction model. *BMJ*  
11 (Clinical research ed). 2020;368:m441.  
12 33. Joie Ensor [aut c, Emma C. Martin [aut], Richard D. Riley [aut]. pmsampsize:  
13 Calculates the Minimum Sample Size Required for Developing a Multivariable Prediction  
14 Model 2022 [1.1.2:[Available from: [https://cran.r-](https://cran.r-project.org/web/packages/pmsampsize/index.html)  
15 [project.org/web/packages/pmsampsize/index.html](https://cran.r-project.org/web/packages/pmsampsize/index.html).  
16 34. Harrison SA, Oliver D, Arnold HL, Gogia S, Neuschwander-Tetri BA. Development  
17 and validation of a simple NAFLD clinical scoring system for identifying patients without  
18 advanced disease. *Gut*. 2008;57(10):1441-7.  
19 35. Sumida Y, Yoneda M, Hyogo H, Itoh Y, Ono M, Fujii H, et al. Validation of the FIB4  
20 index in a Japanese nonalcoholic fatty liver disease population. *BMC Gastroenterology*.  
21 2012;12(1):2.  
22 36. Gupta A, Anoop S, Ansari IA, Prakash S, Misra A. High prevalence of hepatic  
23 steatosis and hepatic fibrosis in patients with type 2 diabetes mellitus. *Clinical Nutrition*  
24 *ESPEN*. 2021;46:519-26.  
25 37. Tuong TTK, Tran DK, Phu PQT, Hong TND, Dinh TC, Chu DT. Non-Alcoholic Fatty  
26 Liver Disease in Patients with Type 2 Diabetes: Evaluation of Hepatic Fibrosis and  
27 Steatosis Using Fibroscan. *Diagnostics (Basel)*. 2020;10(3):159.  
28 38. Wong VW-S, Chan W-K, Chitturi S, Chawla Y, Dan YY, Duseja A, et al. Asia-Pacific  
29 Working Party on Non-alcoholic Fatty Liver Disease guidelines 2017—Part 1: Definition,  
30 risk factors and assessment. *Journal of gastroenterology and hepatology*. 2018;33(1):70-  
31 85.  
32  
33  
34  
35  
36  
37  
38  
39

40 Figures -

41 Figure 4 Natural history of nonalcoholic fatty liver disease

42 NAFLD - nonalcoholic fatty liver disease, NASH - nonalcoholic steatohepatitis, HCC –  
43 hepatocellular carcinoma  
44  
45  
46  
47

48 Figure 5 Liver stiffness cut-offs in chronic liver diseases

49 kPa - kilo Pascal  
50  
51  
52  
53

54 Figure 6 Study design and participant flow through the study

55 FIB-4 score - fibrosis 4 score, LSM - liver stiffness measure, kPa - kilo Pascal  
56  
57  
58  
59  
60

1  
2  
3  
4  
5  
6  
7  
8  
9  
10  
11  
12  
13  
14  
15  
16  
17  
18  
19  
20  
21  
22  
23  
24  
25  
26  
27  
28  
29  
30  
31  
32  
33  
34  
35  
36  
37  
38  
39  
40  
41  
42  
43  
44  
45  
46  
47  
48  
49  
50  
51  
52  
53  
54  
55  
56  
57  
58  
59  
60

For peer review only



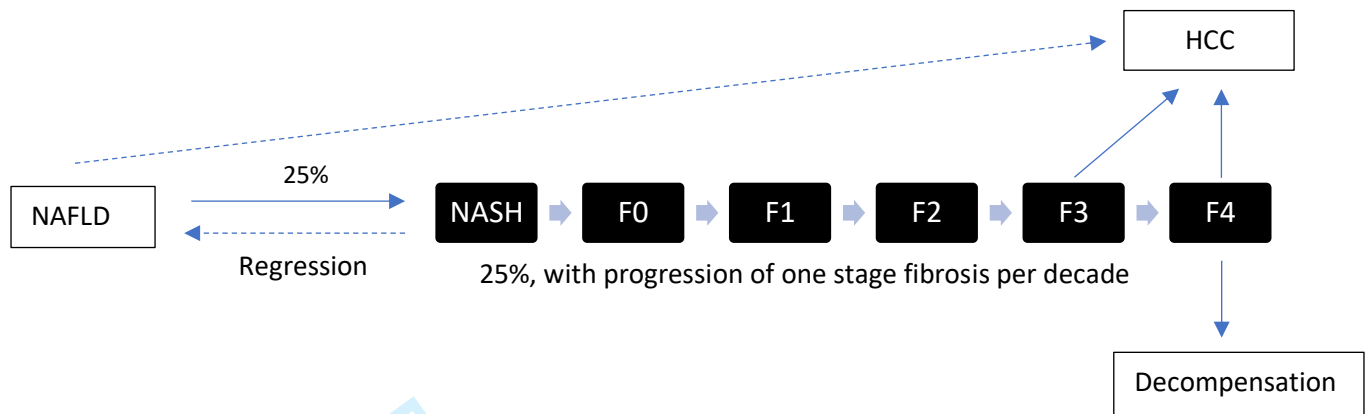

Figure 1 Natural history of nonalcoholic fatty liver disease

NAFLD - nonalcoholic fatty liver disease, NASH - nonalcoholic steatohepatitis, HCC – hepatocellular carcinoma

1  
2  
3  
4  
5  
6  
7  
8  
9  
10  
11  
12  
13  
14  
15  
16  
17  
18  
19  
20  
21  
22  
23  
24  
25  
26  
27  
28  
29  
30  
31  
32  
33  
34  
35  
36  
37  
38  
39  
40  
41  
42  
43  
44  
45  
46  
47  
48  
49  
50  
51  
52  
53  
54  
55  
56  
57  
58  
59  
60

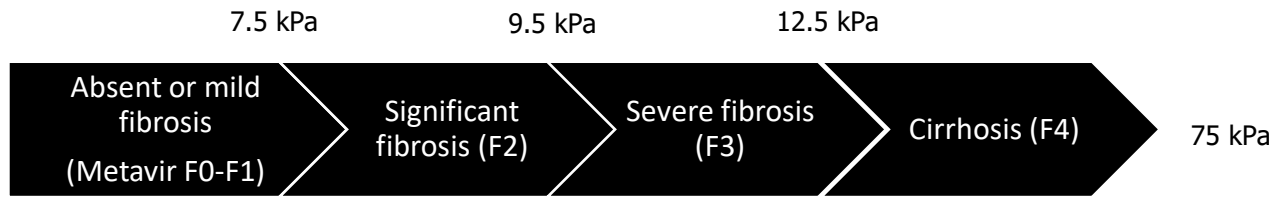

*Figure 2 Liver stiffness cut-offs in chronic liver diseases*

For peer review only

1  
2  
3  
4  
5  
6  
7  
8  
9  
10  
11  
12  
13  
14  
15  
16  
17  
18  
19  
20  
21  
22  
23  
24  
25  
26  
27  
28  
29  
30  
31  
32  
33  
34  
35  
36  
37  
38  
39  
40  
41  
42  
43  
44  
45  
46  
47  
48  
49  
50  
51  
52  
53  
54  
55  
56  
57  
58  
59  
60

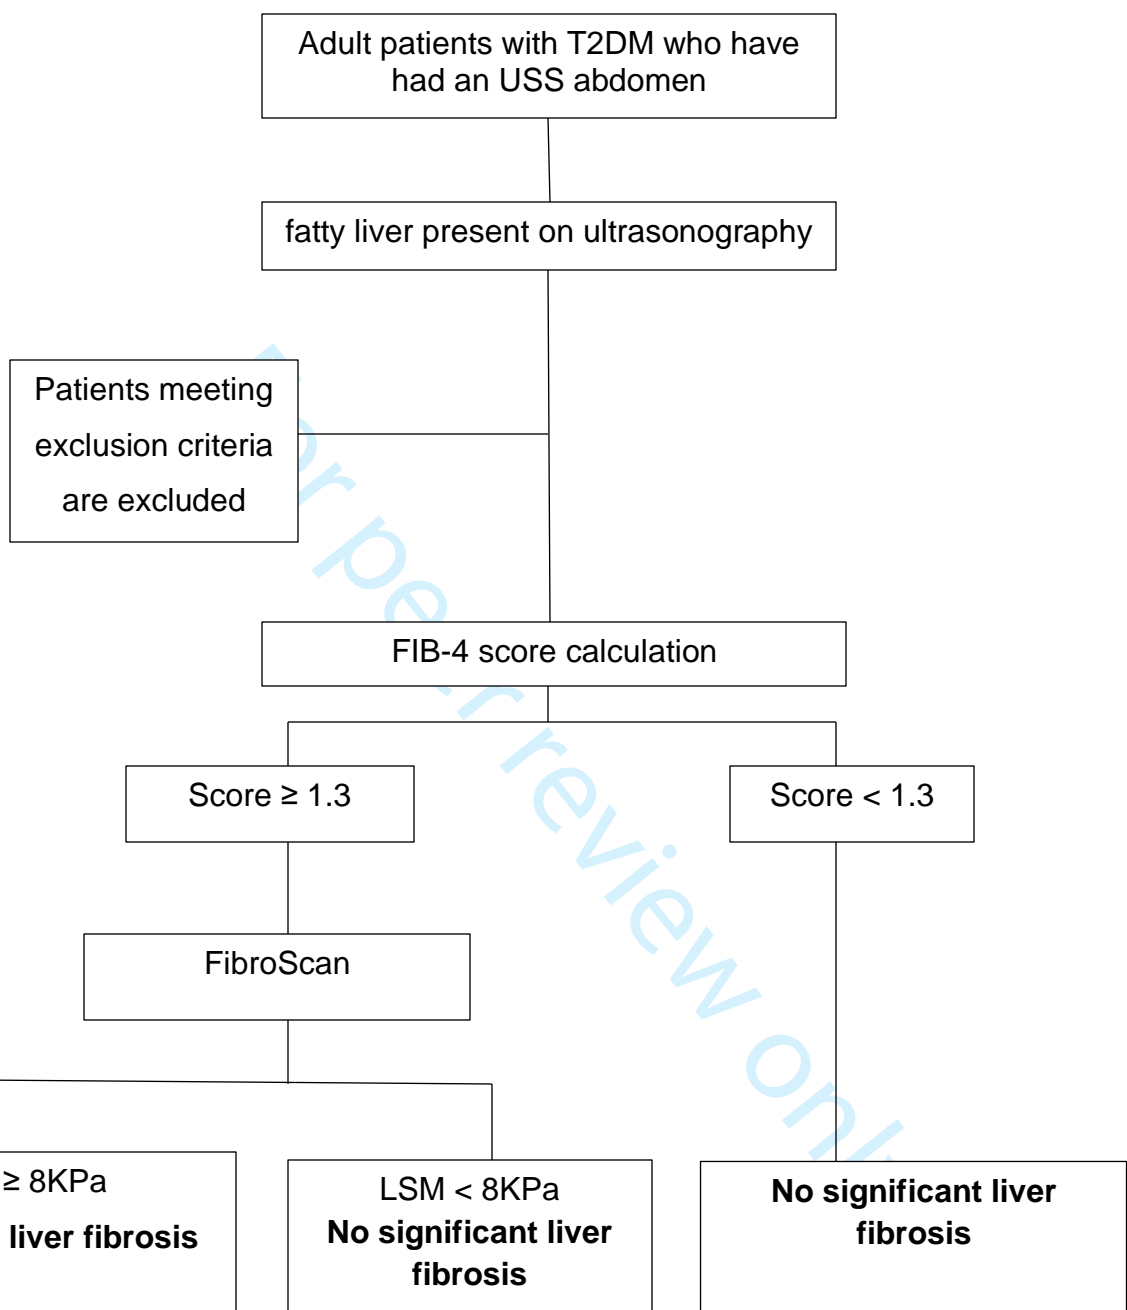

Figure 3 Study design and participant flow through the study

STROBE Statement—Checklist of items that should be included in reports of *cross-sectional studies*

|                           | Item No | Recommendation                                                                                                                                                                                               | Page No |
|---------------------------|---------|--------------------------------------------------------------------------------------------------------------------------------------------------------------------------------------------------------------|---------|
| <b>Title and abstract</b> | 1       | (a) Indicate the study's design with a commonly used term in the title or the abstract                                                                                                                       | 1,2     |
|                           |         | (b) Provide in the abstract an informative and balanced summary of what was done and what was found                                                                                                          | 2       |
| <b>Introduction</b>       |         |                                                                                                                                                                                                              |         |
| Background/rationale      | 2       | Explain the scientific background and rationale for the investigation being reported                                                                                                                         | 4       |
| Objectives                | 3       | State specific objectives, including any prespecified hypotheses                                                                                                                                             | 6       |
| <b>Methods</b>            |         |                                                                                                                                                                                                              |         |
| Study design              | 4       | Present key elements of study design early in the paper                                                                                                                                                      | 6       |
| Setting                   | 5       | Describe the setting, locations, and relevant dates, including periods of recruitment, exposure, follow-up, and data collection                                                                              | 6,7     |
| Participants              | 6       | (a) Give the eligibility criteria, and the sources and methods of selection of participants                                                                                                                  | 6.      |
| Variables                 | 7       | Clearly define all outcomes, exposures, predictors, potential confounders, and effect modifiers. Give diagnostic criteria, if applicable                                                                     | 8       |
| Data sources/measurement  | 8*      | For each variable of interest, give sources of data and details of methods of assessment (measurement). Describe comparability of assessment methods if there is more than one group                         | 7,8     |
| Bias                      | 9       | Describe any efforts to address potential sources of bias                                                                                                                                                    | 7       |
| Study size                | 10      | Explain how the study size was arrived at                                                                                                                                                                    | 7       |
| Quantitative variables    | 11      | Explain how quantitative variables were handled in the analyses. If applicable, describe which groupings were chosen and why                                                                                 | 8       |
| Statistical methods       | 12      | (a) Describe all statistical methods, including those used to control for confounding                                                                                                                        | 8       |
|                           |         | (b) Describe any methods used to examine subgroups and interactions                                                                                                                                          | 8       |
|                           |         | (c) Explain how missing data were addressed                                                                                                                                                                  |         |
|                           |         | (d) If applicable, describe analytical methods taking account of sampling strategy                                                                                                                           |         |
|                           |         | (e) Describe any sensitivity analyses                                                                                                                                                                        | 8       |
| <b>Results</b>            |         |                                                                                                                                                                                                              |         |
| Participants              | 13*     | (a) Report numbers of individuals at each stage of study—eg numbers potentially eligible, examined for eligibility, confirmed eligible, included in the study, completing follow-up, and analysed            | 7,8     |
|                           |         | (b) Give reasons for non-participation at each stage                                                                                                                                                         | NA      |
|                           |         | (c) Consider use of a flow diagram                                                                                                                                                                           | 8       |
| Descriptive data          | 14*     | (a) Give characteristics of study participants (eg demographic, clinical, social) and information on exposures and potential confounders                                                                     | NA      |
|                           |         | (b) Indicate number of participants with missing data for each variable of interest                                                                                                                          | NA      |
| Outcome data              | 15*     | Report numbers of outcome events or summary measures                                                                                                                                                         | NA      |
| Main results              | 16      | (a) Give unadjusted estimates and, if applicable, confounder-adjusted estimates and their precision (eg, 95% confidence interval). Make clear which confounders were adjusted for and why they were included | NA      |

|                          |    |                                                                                                                                                                            |       |
|--------------------------|----|----------------------------------------------------------------------------------------------------------------------------------------------------------------------------|-------|
|                          |    | (b) Report category boundaries when continuous variables were categorized                                                                                                  |       |
|                          |    | (c) If relevant, consider translating estimates of relative risk into absolute risk for a meaningful time period                                                           |       |
| Other analyses           | 17 | Report other analyses done—eg analyses of subgroups and interactions, and sensitivity analyses                                                                             | NA    |
| <b>Discussion</b>        |    |                                                                                                                                                                            |       |
| Key results              | 18 | Summarise key results with reference to study objectives                                                                                                                   | NA    |
| Limitations              | 19 | Discuss limitations of the study, taking into account sources of potential bias or imprecision. Discuss both direction and magnitude of any potential bias                 | 3, 10 |
| Interpretation           | 20 | Give a cautious overall interpretation of results considering objectives, limitations, multiplicity of analyses, results from similar studies, and other relevant evidence | NA    |
| Generalisability         | 21 | Discuss the generalisability (external validity) of the study results                                                                                                      | NA    |
| <b>Other information</b> |    |                                                                                                                                                                            |       |
| Funding                  | 22 | Give the source of funding and the role of the funders for the present study and, if applicable, for the original study on which the present article is based              | 10    |

\*Give information separately for exposed and unexposed groups.

**Note:** An Explanation and Elaboration article discusses each checklist item and gives methodological background and published examples of transparent reporting. The STROBE checklist is best used in conjunction with this article (freely available on the Web sites of PLoS Medicine at <http://www.plosmedicine.org/>, Annals of Internal Medicine at <http://www.annals.org/>, and Epidemiology at <http://www.epidem.com/>). Information on the STROBE Initiative is available at [www.strobe-statement.org](http://www.strobe-statement.org).

# BMJ Open

## Identification of patients with type 2 diabetes with non-alcoholic fatty liver disease who are at increased risk of progressing to advanced fibrosis: A cross-sectional study

|                                 |                                                                                                                                                                                                                                                                                                                                                                                                                                                                                                                                                                                                                                                                                                                                                                                                                                                                                                               |
|---------------------------------|---------------------------------------------------------------------------------------------------------------------------------------------------------------------------------------------------------------------------------------------------------------------------------------------------------------------------------------------------------------------------------------------------------------------------------------------------------------------------------------------------------------------------------------------------------------------------------------------------------------------------------------------------------------------------------------------------------------------------------------------------------------------------------------------------------------------------------------------------------------------------------------------------------------|
| Journal:                        | <i>BMJ Open</i>                                                                                                                                                                                                                                                                                                                                                                                                                                                                                                                                                                                                                                                                                                                                                                                                                                                                                               |
| Manuscript ID                   | bmjopen-2022-063959.R1                                                                                                                                                                                                                                                                                                                                                                                                                                                                                                                                                                                                                                                                                                                                                                                                                                                                                        |
| Article Type:                   | Protocol                                                                                                                                                                                                                                                                                                                                                                                                                                                                                                                                                                                                                                                                                                                                                                                                                                                                                                      |
| Date Submitted by the Author:   | 11-Nov-2022                                                                                                                                                                                                                                                                                                                                                                                                                                                                                                                                                                                                                                                                                                                                                                                                                                                                                                   |
| Complete List of Authors:       | Mettananda, Chamila; University of Kelaniya, Department of Pharmacology<br>Egodage, Thimira; University of Kelaniya Faculty of Medicine, Department of Pharmacology, Clinical Trials Unit<br>Dantanarayana, Channaka; University of Kelaniya Faculty of Medicine, Department of Pharmacology, Clinical Trials Unit<br>Fernando, Rumal; Noth Colombo Teaching Hospital<br>Ranaweera, Lakmali; Noth Colombo Teaching Hospital<br>Luke, Nathasha; University of Kelaniya, Department of Pharmacology<br>Ranawaka, Chamila; Noth Colombo Teaching Hospital<br>Kottahachchi, Dulani; University of Kelaniya Faculty of Medicine, Department of Physiology<br>Pathmeswaran, Arunasalam; University of Kelaniya Faculty of Medicine, Public Health<br>de Silva, Hithanadura; University of Kelaniya Faculty of Medicine, Medicine<br>Dassanayake, Anuradha; University of Kelaniya Faculty of Medicine, Pharmacology |
| <b>Primary Subject Heading</b>: | Gastroenterology and hepatology                                                                                                                                                                                                                                                                                                                                                                                                                                                                                                                                                                                                                                                                                                                                                                                                                                                                               |
| Secondary Subject Heading:      | Gastroenterology and hepatology, Diabetes and endocrinology                                                                                                                                                                                                                                                                                                                                                                                                                                                                                                                                                                                                                                                                                                                                                                                                                                                   |
| Keywords:                       | General diabetes < DIABETES & ENDOCRINOLOGY, General endocrinology < DIABETES & ENDOCRINOLOGY, Hepatology < INTERNAL MEDICINE, Gastroenterology < INTERNAL MEDICINE                                                                                                                                                                                                                                                                                                                                                                                                                                                                                                                                                                                                                                                                                                                                           |
|                                 |                                                                                                                                                                                                                                                                                                                                                                                                                                                                                                                                                                                                                                                                                                                                                                                                                                                                                                               |

SCHOLARONE™  
Manuscripts

**Title Page**

**Title of the article** - Identification of patients with type 2 diabetes with non-alcoholic fatty liver disease who are at increased risk of progressing to advanced fibrosis: A cross-sectional study

**Full name, postal address and e-mail of the corresponding author –**

Chamila Mettananda

Department of Pharmacology, Faculty of Medicine, University of Kelaniya, Ragama, Sri Lanka

[chamila@kln.ac.lk](mailto:chamila@kln.ac.lk)

**Full name, department, institution, city and country of all co-authors**

- Chamila Mettananda, Department of Pharmacology, University of Kelaniya, Ragama, Sri Lanka
- Thimira Egodage, Department of Pharmacology, University of Kelaniya, Ragama, Sri Lanka
- Channaka Dantanarayana, Department of Pharmacology, University of Kelaniya, Ragama, Sri Lanka
- Rumal Fernando, North Colombo Teaching Hospital, Ragama, Sri Lanka
- Lakmali Ranaweera, North Colombo Teaching Hospital, Ragama, Sri Lanka
- Nathasha Luke, Department of Pharmacology, University of Kelaniya, Ragama, Sri Lanka
- Chamila Ranawaka, North Colombo Teaching Hospital, Ragama, Sri Lanka
- Dulani Kottahachchi, Department of Physiology, University of Kelaniya, Ragama, Sri Lanka
- Arunasalam Pathmeswaran, Department of Public Health, University of Kelaniya, Ragama, Sri Lanka
- Janaka de Silva, Department of Medicine, University of Kelaniya, Ragama, Sri Lanka
- Anuradha Dassanayake, Department of Pharmacology, University of Kelaniya, Ragama, Sri Lanka

**Word count, excluding title page, abstract, references, figures and tables**

2095

1  
2 35 **Abstract:**  
3

4 36  
5 37 **Introduction;**  
6  
7 38 Identification of advanced hepatic fibrosis in non-alcoholic fatty liver disease (NAFLD) is  
8  
9 39 important as this may progress to cirrhosis and hepatocellular carcinoma. The risk of  
10  
11 40 hepatic fibrosis is especially high among patients with diabetes with NAFLD. Annual  
12  
13 41 screening of patients with diabetes for fatty liver and calculation of FIB-4 score and  
14  
15 42 exclusion of significant fibrosis with vibration controlled transient elastography (VCTE) has  
16  
17 43 been recommended. However, VCTE is expensive and may not be freely available in  
18  
19 44 resource-limited settings. We aim to identify predictors of significant liver fibrosis who are at  
20  
21 45 increased risk of progression to advanced liver fibrosis and to develop a prediction model to  
22  
23 46 prioritize referral of patients with diabetes and NAFLD for VCTE.  
24

25 47  
26 48 **Methods and analysis;**

27 49 This cross-sectional study is conducted among all consenting adults with T2DM with  
28  
29 50 NAFLD at the Colombo North Teaching Hospital, Ragama, Sri Lanka. All patients get the  
30  
31 51 FIB-4 score calculated. Those with FIB-4  $\geq 1.3$  undergo VCTE (with FibroScan® by  
32  
33 52 Echosens). Risk associations for progression to advanced liver fibrosis/cirrhosis will be  
34  
35 53 identified by comparing patients with significant fibrosis (LSM  $\geq 8$  kPa) and without  
36  
37 54 significant fibrosis (LSM  $< 8$  kPa). A model to predict significant liver fibrosis will be  
38  
39 55 developed using logistic regression.  
40

41 56  
42 57 **Ethics and dissemination.** Ethical approval has been obtained from the Ethics Committee  
43  
44 58 of the Faculty of Medicine, University of Kelaniya (P/66/07/2021). Results of the study will  
45  
46 59 be disseminated as scientific publications in reputed journals.  
47

48 60  
49 61 **Keywords:** Nonalcoholic Fatty liver disease, NAFLD, Diabetes mellitus, Prediction,  
50  
51 62 significant liver fibrosis, cross-sectional study, vibration controlled transient elastography  
52  
53 63  
54 64  
55 65  
56 66



1  
2 67 **Article Summary**  
3

4 68 **Strengths**  
5

- 6 69 • Individual data of patients are used  
7  
8 70 • Advanced fibrosis is confirmed with VCTE (with FibroScan® by Echosens)  
9  
10 71 • Risk factors for advanced fibrosis out of over 100 variables will be selected  
11  
12 72 • All possible risk factors will be studied without prejudice and the risk factors with the  
13 73 highest predictive values will be used in the prognostic model  
14  
15 74

16 75 **Limitations**  
17

- 18 76 • This is limited to a Sri Lankan cohort and therefore is not generalizable to all other  
19 77 nations  
20  
21 78 • This cohort is of a community of very low seroprevalence of Hep B and C. However,  
22 79 we have not studied Hepatitis B and C serology in individual patients.  
23  
24  
25 80  
26  
27  
28  
29  
30  
31  
32  
33  
34  
35  
36  
37  
38  
39  
40  
41  
42  
43  
44  
45  
46  
47  
48  
49  
50  
51  
52  
53  
54  
55  
56  
57  
58  
59  
60

## 81 Main text

82

## 83 Introduction

---

84

85 Non-alcoholic fatty liver disease (NAFLD) is the most common liver disease in the world  
86 with a global prevalence of 25%, with the highest rates in the Middle East and South  
87 America and the lowest in Africa (1-3). NAFLD is a spectrum ranging from simple  
88 steatosis, nonalcoholic steatohepatitis (NASH) to cirrhosis (Figure 1)(4). NASH is strongly  
89 associated with liver fibrosis and is defined histologically on a scale ranging from F0 to F4.  
90 Stages F0 to F1 have no or minimal fibrosis, F2 is significant fibrosis with risk of  
91 progression to advanced fibrosis, F3 is advanced fibrosis and F4 cirrhosis (Figure 2) (5).  
92 Fibrosis of the liver can be measured non-invasively with vibration-controlled transient  
93 elastography (VCTE) with FibroScan® by Echosens which measures liver stiffness. A liver  
94 stiffness measure (LSM) between 2.5 - 7 kPa is suggestive of absent or mild fibrosis,  $\geq 7.1$   
95 kPa significant fibrosis ( $\geq F2$ ),  $\geq 9.5$  kPa advanced fibrosis ( $\geq F3$ ) and  $\geq 12.5$  kPa, cirrhosis  
96 (F=4)(5, 6).

97

98 NAFLD is a dynamic condition that can regress to simple steatosis with liver-directed  
99 therapy, smoulder at a relatively constant level of activity, or cause progressive fibrosis and  
100 lead to cirrhosis. However, the majority of NAFLD patients have a benign course and only  
101 10% develop progressive fibrosis leading to cirrhosis and hepatocellular carcinoma (HCC)  
102 (7, 8). There is no widely accepted pharmacological treatment for established cirrhosis and  
103 the only curative treatment is liver transplantation. However, progressive NASH and its  
104 complications such as cirrhosis could be delayed or prevented if people with increased risk  
105 of progressive fibrosis are detected early in the course of the disease (at F2-3 stage or  
106 LSM  $\leq 8$  kPa) and liver-directed therapies are initiated. This is the key to reducing the liver-  
107 related burden of NAFLD in both high- and low-income countries (9).

108

109

110 *Figure 1*

111

1  
2 112  
3  
4 113  
5  
6 114  
7 115  
8  
9 116  
10  
11 117  
12  
13 118  
14 119  
15  
16 120  
17  
18 121  
19 122  
20  
21 123  
22  
23 124  
24  
25 125  
26 126  
27  
28 127  
29  
30 128  
31 129  
32  
33 130  
34  
35 131  
36  
37 132  
38 133  
39  
40 134  
41  
42 135  
43  
44 136  
45 137  
46  
47 138  
48  
49 139  
50  
51 140  
52 141  
53  
54 142  
55  
56 143  
57 144  
58  
59  
60

*Figure 2*

NAFLD is the hepatic manifestation of insulin resistance, which is the hallmark of type 2 diabetes mellitus (T2DM) (10). It is three times more prevalent among patients with diabetes than in the general population (11). Globally, 55.5% of patients with T2DM and 62% of Asians with T2DM have NAFLD (12) (13). On the other hand, NAFLD is considered a risk factor for T2DM (14, 15), and NAFLD patients have a two-fold increased risk of developing T2DM compared to those without NAFLD (16). Diabetes is independently associated with the degree of steatosis, NAFLD progression to NASH, advanced fibrosis, and the development of HCC (17-20). The progression of NAFLD to advanced fibrosis is two times higher among patients with diabetes than in the general population. Around 20% of T2DM patients with NAFLD progress to advanced liver fibrosis over a mean of 5.9 years (9)(21). Therefore, both the American Diabetes Association(2020) (22) and the European Association for the Study of the Liver(2016) (23) recommend screening of all T2DM patients for NAFLD to prevent liver-related complications of NAFLD. There are two proposed algorithms for screening patients with diabetes for NAFLD, and both propose annual screening of patients with diabetes with NAFLD but using two different screening tools; one using the Fibrosis-4 score (FIB-4) (24, 25) and the other using the NAFLD fibrosis score (NFS)(26, 27). The proposed algorithm involves two steps. The first is an annual screening of patients with diabetes with NAFLD and the second step is liver stiffness measurement (LSM) using transient elastography (26) for those with FIB-4  $\geq 1.3$  (25) or NFS between -1.455 to 0.676 (26). The patients at high risk of advanced fibrosis/cirrhosis with an LSM  $\geq 8$  kPa are advised referral to specialized liver centres for further assessment and management (25, 28) (29-31).

Diabetes has become an epidemic in low-middle-income countries including those in Asia. Of the world's population with diabetes, 60% are Asian (32). Diabetes is on the rise among Asians due to urbanization, changing to Western lifestyles and dietary habits in addition to a relatively high genetic predisposition (33, 34). Asians are at higher risk of developing T2DM compared with people of European ancestry with genetic predisposition through PNPLA3 SNPs and polymorphisms in apolipoprotein (32). However, VCTE is expensive and is not freely available for all patients with diabetes in low-middle income countries.

1  
2 145  
3  
4 146 Therefore, we aimed to identify clinical predictors of significant liver fibrosis with risk of  
5  
6 147 progression to advanced liver fibrosis (i.e.: LSM  $\geq$ 8 kPa) (29)) in patients with type 2  
7  
8 148 diabetes who are at risk of progression to advanced liver fibrosis and cirrhosis, and develop  
9  
10 149 a model to identify patients at high risk of progression to advanced fibrosis. This we hope  
11  
12 150 will help to guide clinicians in primary and secondary care in resource-poor settings to  
13  
14 151 prioritize referrals for VCTE and to specialized liver centres.  
15

## 16 153 **Methods and analysis**

### 17 154 **Study design and setting**

18  
19 155 This study is an ongoing cross-sectional study to identify patients with diabetes with NAFLD  
20  
21 156 who are at risk of progression to advanced liver fibrosis and/or cirrhosis. We compare the  
22  
23 157 risk associations of patients with advanced liver fibrosis diagnosed by an LSM  $\geq$ 8 kPa by  
24  
25 158 transient elastography and patients with no or minimal liver fibrosis diagnosed by FIB-4  
26  
27 159 score  $<$ 1.3. The study is being conducted at the Colombo North Teaching Hospital,  
28  
29 160 Ragama, Sri Lanka.  
30

### 31 162 **Study objectives**

32  
33 163 To identify patients with diabetes with NAFLD who are at increased risk of progression to  
34  
35 164 advanced liver fibrosis/cirrhosis and to develop a prediction model for the same. We further  
36  
37 165 plan to validate the FIB-4 score among Sri Lankans.  
38

### 39 166 40 167 **Study population and eligibility criteria**

41  
42 168 All adult patients with T2DM attending Medical/Diabetes Clinics of three Consultants at  
43  
44 169 three private sector hospitals of the Gampaha District of Sri Lanka over 12 consecutive  
45  
46 170 months who have ultrasonographic evidence of NAFLD will be the study population.  
47

### 48 171 49 172 **Inclusion criteria**

- 50 173
- 51 174 • Patients with confirmed T2DM
  - 52 175 • Patients who are aged over 18 years
  - 53 176 • Patients who have ultrasonic (US) evidence of fatty liver in a US scan done within the  
54 previous 3 months of recruitment  
55  
56  
57  
58  
59  
60

177

**Exclusion criteria**

- 179 • Patients without consent
- 180 • Patients with established cirrhosis on US scan
- 181 • Males consuming alcohol > 14 units/week and females consuming alcohol > 7
- 182 units/week
- 183 • Evidence of Hepatitis B or C infection
- 184 • Patients with diagnosed liver diseases of known aetiology other than NAFLD
- 185 • Patients on medications known to cause fatty liver or liver fibrosis e.g., tamoxifen,
- 186 methotrexate etc.

187

**Sample size**

189 The sample size was calculated for developing a clinical prediction model (35, 36)  
190 assuming an R-squared value of 0.2 for the logistic model, 10 parameters in the model, and  
191 0.05 acceptable difference in apparent & adjusted R-squared, 0.05 margin of error in the  
192 estimation of intercept and an anticipated prevalence of advanced liver fibrosis of 15%  
193 among T2DM with NAFLD (37).

194

195 The calculated minimum sample size is 398 patients with T2DM with NAFLD (among whom  
196 60 are expected to have significant fibrosis, i.e.: LSM  $\geq$ 8 kPa). This is likely to provide 6  
197 events per Predictor Parameter (EPP).

198

**Patient recruitment -**

200 Consecutive adult patients (>18 years) with T2DM attending Medical/Diabetes Clinics of  
201 three Consultants at three private sector hospitals of the Gampaha District of Sri Lanka  
202 over 12 consecutive months starting from November 2021 are being screened and the  
203 eligible patients are recruited to this study after being referred to the Gastroenterology and  
204 Hepatology clinic of the Colombo North Teaching Hospital Ragama until the sample size is  
205 achieved (Figure 3). All eligible patients are given a patient information sheet to read and  
206 time to clarify doubts with investigators before consenting. The participants will be informed  
207 about the study including the data collection procedure and that a subgroup of participants  
208 will undergo a non-invasive VCTE of the liver free of charge. The patients will be made  
209 aware of the ability to withdraw consent at any point without having to give reasons.

1  
2 210 Informed written consent from all participants will be obtained before recruiting into the  
3  
4 211 study. Permission has been obtained from the director of the North Colombo Teaching  
5  
6 212 Hospital and the consultant in charge of the Diabetic and Endocrine clinics to carry out the  
7  
8 213 study.

9 214

10  
11 215

12 216 Figure 3

13  
14 217

15  
16 218

17  
18 219

### 19 220 Study procedure

20  
21 221 Patients with diabetes mellitus and complying with inclusion and exclusion criteria will be  
22  
23 222 interviewed and medical records will be assessed. Data will be collected using an  
24  
25 223 interviewer-administered questionnaire. Information on demography, history of metabolic  
26  
27 224 risk factors, medications, diet, and exercise will be recorded. Haematological and  
28  
29 225 biochemical investigations done within 3 months before recruitment will be extracted from  
30  
31 226 clinic records. Anthropometry: height, weight and waist circumference will be measured at  
32  
33 227 recruitment. FIB-4 score will be calculated for all patients using age, sex, and the most  
34  
35 228 recent AST, ALT and platelet count done within 3 months of recruitment to the study. All  
36  
37 229 patients with a FIB-4 score  $\geq 1.3$  will undergo VCTE of the liver free of charge by a single,  
38  
39 230 trained medical officer. LSM and CAP measures will be recorded. A subset of patients with  
40  
41 231 a FIB-4 score  $<1.3$  will also undergo VCTE to confirm the validity of the FIB-4 score to  
42  
43 232 exclude significant liver fibrosis.

44 233

### 45 234 Statistical analysis

46  
47 235 IBM SPSS 22.0 software will be used for data management and analyses. Multiple logistic  
48  
49 236 regression will be used to identify factors associated with significant and beyond liver  
50  
51 237 fibrosis. A model will be developed using the identified risk factors to predict “significant  
52  
53 238 liver fibrosis” according to their weighted scores ( $\beta$ -coefficient). Cut-off points and the  
54  
55 239 sensitivity and specificity of predictions will be determined using ROC curves. The  
56  
57 240 predictions of the new model will be compared with the predictions of the simple FIB-4  
58  
59 241 score.

60 242

## 243 Data management and monitoring

244 All completed questionnaires and VCTE reports will be stored securely. An electronic  
245 screening log and database will be maintained as a password-protected file.

## 247 Ethical considerations

248 This is not an interventional study and is associated with no risks to the patients. Selected  
249 patients will undergo non-invasive VCTE of the liver free of charge at the North Colombo  
250 Teaching Hospital which is the only state hospital with a fibro scanner in Sri Lanka. There  
251 are no risks associated with this scan. The results of the scan will only be divulged to the  
252 treating physician of the patients for initiation of relevant treatment options. The findings of  
253 the study could be beneficial to all patients with diabetes in the early diagnosis/prediction of  
254 significant liver fibrosis in individuals. Participants will have the right to withdraw from the  
255 study at any point without providing explanations. Ethical approval for the study has been  
256 obtained from the Ethics Committee of the Faculty of Medicine, University of Kelaniya, Sri  
257 Lanka (Ref. P/66/07/2021).

## 259 Termination of the study

260 The study will be terminated if:

- 261 • A new and cost-effective tool to predict significant liver fibrosis that changes current  
262 guidelines become available.
- 263 • Significant violation of good clinical practice that compromises the ability to achieve  
264 study objectives or compromises subject safety occurs.

## 266 Study status

267 The trial commenced in November 2021 according to the protocol version 2.0, 06 August  
268 2021 and is currently open for recruitment. We have recruited 220 patients for the study so  
269 far.

## 271 Patient and public involvement

272 Reports of the VCTE (LSM) done as part of the trial will be available to all participants who  
273 request it and will be used in the standard management when required. All patients are  
274 given a health education leaflet on Fatty Liver and secondary prevention. Results of the  
275 VCTE are notified to the treating physician for necessary action. The results of the study

1  
2 276 will be disseminated to study participants and other patients with diabetes and fatty liver  
3  
4 277 using patient education leaflets and lectures after completion of the study.

5  
6 278

## 7 279 **Discussion**

---

9 280 In this study, we aim to develop a practical, cost-effective model to predict patients with  
10  
11 281 diabetes with NAFLD who are at increased risk of progressing to advanced liver fibrosis  
12  
13 282 and/or cirrhosis to target those that require transient elastography. Furthermore, even  
14  
15 283 though there are non-invasive markers of liver fibrosis such as FIB-4 (24), BRAD (38), and  
16  
17 284 NFS (27), none of these has been developed specifically for patients with diabetes and has  
18  
19 285 been validated in Asian except among Japanese (39).

20 286

21 287 Apart from a few studies from North India (40) and Vietnam (41), there are no reports of  
22  
23 288 VCTE data in patients with diabetes from Asia. There is no data on VCTE from Sri Lanka.  
24  
25 289 Furthermore, the FIB-4 score has not been validated among Sri Lankans. Through our  
26  
27 290 study, we hope to provide a low-cost, practical model to identify the patients with type 2  
28  
29 291 diabetes and NAFLD who are at increased risk of progression to advanced  
30  
31 292 fibrosis/cirrhosis.

32 293

## 33 294 **Limitations**

---

35 295 Liver biopsy is the gold standard for staging liver fibrosis but in our study, VCTE will be  
36  
37 296 used to diagnose significant liver fibrosis (42). However, liver biopsy is an invasive  
38  
39 297 procedure and current practice guidelines recommend VCTE as a surrogate to exclude  
40  
41 298 advanced fibrosis, with liver biopsy reserved for those with equivocal VCTE results (25, 26).

42 299

44 300 **Author Contributions:** CM conceived the study. CM,TE, CD, RF,NL, LR, CR, DK, AP  
45  
46 301 JdeS and AD contributed to the study design. CM drafted the manuscript and AD, and  
47  
48 302 JdeS significantly edited the manuscript. All authors assisted in developing the protocol and  
49  
50 303 have read, reviewed, edited, and approved the final manuscript.

51 304

52  
53 305 **Funding:** This research received no specific grant from any funding agency in the public,  
54  
55 306 commercial or not-for-profit sectors

56 307



1  
2 308 **Competing interests:** None declared.

3  
4 309

5 310 **Patient consent for publication:** Not required.

6  
7 311

8  
9 312 **Data statement :** Technical appendix, statistical code, and dataset available from the  
10  
11 313 corresponding author on a valid request

12  
13 314

14  
15 315 **Provenance and peer review:** Not commissioned

16  
17 316

18 317 **Acknowledgement :** Jayani Manchanayake and Dileepa Ediriweera for helping in  
19  
20 318 developing the protocol.

21  
22 319

23  
24 320

25  
26 321

## 27 322 **References**

- 28  
29 323 1. Ekstedt M, Hagström H, Nasr P, Fredrikson M, Stål P, Kechagias S, et al. Fibrosis  
30 324 stage is the strongest predictor for disease-specific mortality in NAFLD after up to 33 years  
31 325 of follow-up. *Hepatology*. 2015;61(5):1547-54.
- 32 326 2. Younossi ZM, Koenig AB, Abdelatif D, Fazel Y, Henry L, Wymer M. Global  
33 327 epidemiology of nonalcoholic fatty liver disease-Meta-analytic assessment of prevalence,  
34 328 incidence, and outcomes. *Hepatology*. 2016;64(1):73-84.
- 35 329 3. Amarapurkar DN, Hashimoto E, Lesmana LA, Sollano JD, Chen PJ, Goh KL. How  
36 330 common is non-alcoholic fatty liver disease in the Asia-Pacific region and are there local  
37 331 differences? *Journal of gastroenterology and hepatology*. 2007;22(6):788-93.
- 38 332 4. Diehl AM, Day C. Cause, Pathogenesis, and Treatment of Nonalcoholic  
39 333 Steatohepatitis. *N Engl J Med*. 2017;377(21):2063-72.
- 40 334 5. Castera L, Forns X, Alberti A. Non-invasive evaluation of liver fibrosis using transient  
41 335 elastography. *J Hepatol*. 2008;48(5):835-47.
- 42 336 6. Castéra L, Vergniol J, Foucher J, Le Bail B, Chanteloup E, Haaser M, et al.  
43 337 Prospective comparison of transient elastography, Fibrotest, APRI, and liver biopsy for the  
44 338 assessment of fibrosis in chronic hepatitis C. *Gastroenterology*. 2005;128(2):343-50.
- 45 339 7. Brunt EM, Janney CG, Di Bisceglie AM, Neuschwander-Tetri BA, Bacon BR.  
46 340 Nonalcoholic steatohepatitis: a proposal for grading and staging the histological lesions.  
47 341 *Am J Gastroenterol*. 1999;94(9):2467-74.
- 48 342 8. Diehl AM, Day C. Cause, Pathogenesis, and Treatment of Nonalcoholic  
49 343 Steatohepatitis. *New England Journal of Medicine*. 2017;377(21):2063-72.
- 50 344 9. Eslam M, Sanyal AJ, George J. MAFLD: A Consensus-Driven Proposed  
51 345 Nomenclature for Metabolic Associated Fatty Liver Disease. *Gastroenterology*.  
52 346 2020;158(7):1999-2014.e1.

10. Alkhouri N, Poordad F, Lawitz E. Management of nonalcoholic fatty liver disease: Lessons learned from type 2 diabetes. *Hepatology Communications*. 2018;2(7):778-85.
11. Saponaro C, Gaggini M, Gastaldelli A. Nonalcoholic fatty liver disease and type 2 diabetes: common pathophysiologic mechanisms. *Curr Diab Rep*. 2015;15(6):607.
12. Younossi ZM, Golabi P, de Avila L, Paik JM, Srishord M, Fukui N, et al. The global epidemiology of NAFLD and NASH in patients with type 2 diabetes: A systematic review and meta-analysis. *J Hepatol*. 2019;71(4):793-801.
13. Herath HMM, Kodikara I, Weeraratna TP, Liyanage G. Prevalence and associations of non-alcoholic fatty liver disease (NAFLD) in Sri Lankan patients with type 2 diabetes: A single center study. *Diabetes Metab Syndr*. 2019;13(1):246-50.
14. Adams LA, Waters OR, Knuiaman MW, Elliott RR, Olynyk JK. NAFLD as a risk factor for the development of diabetes and the metabolic syndrome: an eleven-year follow-up study. *Am J Gastroenterol*. 2009;104(4):861-7.
15. Shibata M, Kihara Y, Taguchi M, Tashiro M, Otsuki M. Nonalcoholic Fatty Liver Disease Is a Risk Factor for Type 2 Diabetes in Middle-Aged Japanese Men. *Diabetes Care*. 2007;30(11):2940-4.
16. Kasturiratne A, Weerasinghe S, Dassanayake AS, Rajindrajith S, de Silva AP, Kato N, et al. Influence of non-alcoholic fatty liver disease on the development of diabetes mellitus. *Journal of gastroenterology and hepatology*. 2013;28(1):142-7.
17. Hossain N, Afendy A, Stepanova M, Nader F, Srishord M, Rafiq N, et al. Independent predictors of fibrosis in patients with nonalcoholic fatty liver disease. *Clin Gastroenterol Hepatol*. 2009;7(11):1224-9, 9.e1-2.
18. Vernon G, Baranova A, Younossi ZM. Systematic review: the epidemiology and natural history of non-alcoholic fatty liver disease and non-alcoholic steatohepatitis in adults. *Aliment Pharmacol Ther*. 2011;34(3):274-85.
19. Loomba R, Abraham M, Unalp A, Wilson L, Lavine J, Doo E, et al. Association between diabetes, family history of diabetes, and risk of nonalcoholic steatohepatitis and fibrosis. *Hepatology*. 2012;56(3):943-51.
20. Fracanzani AL, Valenti L, Bugianesi E, Andreoletti M, Colli A, Vanni E, et al. Risk of severe liver disease in nonalcoholic fatty liver disease with normal aminotransferase levels: a role for insulin resistance and diabetes. *Hepatology*. 2008;48(3):792-8.
21. Singh S, Allen AM, Wang Z, Prokop LJ, Murad MH, Loomba R. Fibrosis progression in nonalcoholic fatty liver vs nonalcoholic steatohepatitis: a systematic review and meta-analysis of paired-biopsy studies. *Clin Gastroenterol Hepatol*. 2015;13(4):643-54.e1-9; quiz e39-40.
22. Association AD. 4. Comprehensive Medical Evaluation and Assessment of Comorbidities: Standards of Medical Care in Diabetes—2020. *Diabetes Care*. 2019;43(Supplement\_1):S37-S47.
23. EASL-EASD-EASO Clinical Practice Guidelines for the management of non-alcoholic fatty liver disease. *J Hepatol*. 2016;64(6):1388-402.
24. Shah AG, Lydecker A, Murray K, Tetri BN, Contos MJ, Sanyal AJ. Comparison of noninvasive markers of fibrosis in patients with nonalcoholic fatty liver disease. *Clin Gastroenterol Hepatol*. 2009;7(10):1104-12.
25. Vieira Barbosa J, Lai M. Nonalcoholic Fatty Liver Disease Screening in Type 2 Diabetes Mellitus Patients in the Primary Care Setting. *Hepatology Communications*. 2021;5(2):158-67.
26. Castera L, Vilgrain V, Angulo P. Noninvasive evaluation of NAFLD. *Nature Reviews Gastroenterology & Hepatology*. 2013;10(11):666-75.

- 1  
2 395 27. Angulo P, Hui JM, Marchesini G, Bugianesi E, George J, Farrell GC, et al. The  
3 396 NAFLD fibrosis score: a noninvasive system that identifies liver fibrosis in patients with  
4 397 NAFLD. *Hepatology*. 2007;45(4):846-54.
- 5 398 28. Petroni ML, Brodosi L, Bugianesi E, Marchesini G. Management of non-alcoholic  
6 399 fatty liver disease. *BMJ (Clinical research ed)*. 2021;372:m4747.
- 7 400 29. Li Q, Huang C, Xu W, Hu Q, Chen L. Accuracy of FibroScan in analysis of liver  
8 401 fibrosis in patients with concomitant chronic Hepatitis B and nonalcoholic fatty liver disease.  
9 402 *Medicine*. 2020;99(23).
- 10 403 30. Cusi K, Isaacs S, Barb D, Basu R, Caprio S, Garvey WT, et al. American  
11 404 Association of Clinical Endocrinology Clinical Practice Guideline for the Diagnosis and  
12 405 Management of Nonalcoholic Fatty Liver Disease in Primary Care and Endocrinology  
13 406 Clinical Settings: Co-Sponsored by the American Association for the Study of Liver  
14 407 Diseases (AASLD). *Endocrine Practice*. 2022;28(5):528-62.
- 15 408 31. Mózes FE, Lee JA, Selvaraj EA, Jayaswal ANA, Trauner M, Boursier J, et al.  
16 409 Diagnostic accuracy of non-invasive tests for advanced fibrosis in patients with NAFLD: an  
17 410 individual patient data meta-analysis. *Gut*. 2022;71(5):1006-19.
- 18 411 32. Chan JCN, Malik V, Jia W, Kadowaki T, Yajnik CS, Yoon K-H, et al. Diabetes in  
19 412 Asia: Epidemiology, Risk Factors, and Pathophysiology. *Jama*. 2009;301(20):2129-40.
- 20 413 33. Dassanayake AS. Nonalcoholic Fatty Liver Disease: Identifying the Disease Burden  
21 414 in Sri Lanka. *Euroasian J Hepatogastroenterol*. 2018;8(1):69-72.
- 22 415 34. Niriella MA, Pathmeswaran A, De Silva ST, Kasturiratna A, Perera R, Subasinghe  
23 416 CE, et al. Incidence and risk factors for non-alcoholic fatty liver disease: A 7-year follow-up  
24 417 study among urban, adult Sri Lankans. *Liver Int*. 2017;37(11):1715-22.
- 25 418 35. Riley RD, Ensor J, Snell KIE, Harrell FE, Jr., Martin GP, Reitsma JB, et al.  
26 419 Calculating the sample size required for developing a clinical prediction model. *BMJ*  
27 420 (Clinical research ed). 2020;368:m441.
- 28 421 36. Joie Ensor [aut c, Emma C. Martin [aut], Richard D. Riley [aut]. pmsampsize:  
29 422 Calculates the Minimum Sample Size Required for Developing a Multivariable Prediction  
30 423 Model 2022 [1.1.2:[Available from: [https://cran.r-](https://cran.r-project.org/web/packages/pmsampsize/index.html)  
31 424 [project.org/web/packages/pmsampsize/index.html](https://cran.r-project.org/web/packages/pmsampsize/index.html)].
- 32 425 37. Lomonaco R, Godinez Leiva E, Bril F, Shrestha S, Mansour L, Budd J, et al.  
33 426 Advanced Liver Fibrosis Is Common in Patients With Type 2 Diabetes Followed in the  
34 427 Outpatient Setting: The Need for Systematic Screening. *Diabetes care*. 2021;44(2):399-  
35 428 406.
- 36 429 38. Harrison SA, Oliver D, Arnold HL, Gogia S, Neuschwander-Tetri BA. Development  
37 430 and validation of a simple NAFLD clinical scoring system for identifying patients without  
38 431 advanced disease. *Gut*. 2008;57(10):1441-7.
- 39 432 39. Sumida Y, Yoneda M, Hyogo H, Itoh Y, Ono M, Fujii H, et al. Validation of the FIB4  
40 433 index in a Japanese nonalcoholic fatty liver disease population. *BMC Gastroenterology*.  
41 434 2012;12(1):2.
- 42 435 40. Gupta A, Anoop S, Ansari IA, Prakash S, Misra A. High prevalence of hepatic  
43 436 steatosis and hepatic fibrosis in patients with type 2 diabetes mellitus. *Clinical Nutrition*  
44 437 *ESPEN*. 2021;46:519-26.
- 45 438 41. Tuong TTK, Tran DK, Phu PQT, Hong TND, Dinh TC, Chu DT. Non-Alcoholic Fatty  
46 439 Liver Disease in Patients with Type 2 Diabetes: Evaluation of Hepatic Fibrosis and  
47 440 Steatosis Using Fibroscan. *Diagnostics (Basel)*. 2020;10(3):159.
- 48 441 42. Wong VW-S, Chan W-K, Chitturi S, Chawla Y, Dan YY, Duseja A, et al. Asia-Pacific  
49 442 Working Party on Non-alcoholic Fatty Liver Disease guidelines 2017—Part 1: Definition,  
50  
51  
52  
53  
54  
55  
56  
57  
58  
59  
60

1  
2 443 risk factors and assessment. Journal of gastroenterology and hepatology. 2018;33(1):70-  
3 444 85.  
4 445

5  
6 446

7  
8 447 Figures -

9  
10 448 Figure 4 Natural history of nonalcoholic fatty liver disease

11 449 NAFLD - nonalcoholic fatty liver disease, NASH - nonalcoholic steatohepatitis, HCC –  
12  
13 450 hepatocellular carcinoma

14  
15 451

16 452 Figure 5 Liver stiffness cut-offs in chronic liver diseases

17 453 kPa - kilo Pascal

18  
19  
20 454

21 455 Figure 6 Study design and participant flow through the study

22 456 FIB-4 score - fibrosis 4 score, LSM - liver stiffness measure, kPa - kilo Pascal

23 457

24  
25  
26 458

27  
28  
29 459

30  
31  
32  
33  
34  
35  
36  
37  
38  
39  
40  
41  
42  
43  
44  
45  
46  
47  
48  
49  
50  
51  
52  
53  
54  
55  
56  
57  
58  
59  
60

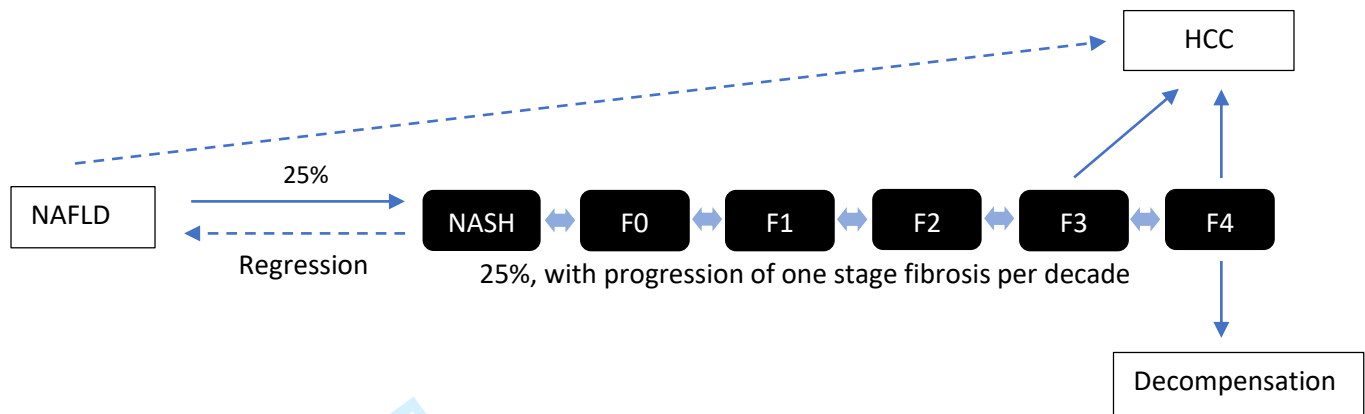

Figure 1 Natural history of nonalcoholic fatty liver disease

NAFLD - nonalcoholic fatty liver disease, NASH - nonalcoholic steatohepatitis, HCC – hepatocellular carcinoma

1  
2  
3  
4  
5  
6  
7  
8  
9  
10  
11  
12  
13  
14  
15  
16  
17  
18  
19  
20  
21  
22  
23  
24  
25  
26  
27  
28  
29  
30  
31  
32  
33  
34  
35  
36  
37  
38  
39  
40  
41  
42  
43  
44  
45  
46  
47  
48  
49  
50  
51  
52  
53  
54  
55  
56  
57  
58  
59  
60



*Figure 2 Liver stiffness cut-offs in chronic liver diseases*

For peer review only

1  
2  
3  
4  
5  
6  
7  
8  
9  
10  
11  
12  
13  
14  
15  
16  
17  
18  
19  
20  
21  
22  
23  
24  
25  
26  
27  
28  
29  
30  
31  
32  
33  
34  
35  
36  
37  
38  
39  
40  
41  
42  
43  
44  
45  
46  
47  
48  
49  
50  
51  
52  
53  
54  
55  
56  
57  
58  
59  
60



Figure 3 Study design and participant flow through the study

STROBE Statement—Checklist of items that should be included in reports of *cross-sectional studies*

|                              | Item No | Recommendation                                                                                                                                                                                               | Page No |
|------------------------------|---------|--------------------------------------------------------------------------------------------------------------------------------------------------------------------------------------------------------------|---------|
| <b>Title and abstract</b>    | 1       | (a) Indicate the study's design with a commonly used term in the title or the abstract                                                                                                                       | 1,2     |
|                              |         | (b) Provide in the abstract an informative and balanced summary of what was done and what was found                                                                                                          | 2       |
| <b>Introduction</b>          |         |                                                                                                                                                                                                              |         |
| Background/rationale         | 2       | Explain the scientific background and rationale for the investigation being reported                                                                                                                         | 4       |
| Objectives                   | 3       | State specific objectives, including any prespecified hypotheses                                                                                                                                             | 6       |
| <b>Methods</b>               |         |                                                                                                                                                                                                              |         |
| Study design                 | 4       | Present key elements of study design early in the paper                                                                                                                                                      | 6       |
| Setting                      | 5       | Describe the setting, locations, and relevant dates, including periods of recruitment, exposure, follow-up, and data collection                                                                              | 6,7     |
| Participants                 | 6       | (a) Give the eligibility criteria, and the sources and methods of selection of participants                                                                                                                  | 6.      |
| Variables                    | 7       | Clearly define all outcomes, exposures, predictors, potential confounders, and effect modifiers. Give diagnostic criteria, if applicable                                                                     | 8       |
| Data sources/<br>measurement | 8*      | For each variable of interest, give sources of data and details of methods of assessment (measurement). Describe comparability of assessment methods if there is more than one group                         | 7,8     |
| Bias                         | 9       | Describe any efforts to address potential sources of bias                                                                                                                                                    | 7       |
| Study size                   | 10      | Explain how the study size was arrived at                                                                                                                                                                    | 7       |
| Quantitative variables       | 11      | Explain how quantitative variables were handled in the analyses. If applicable, describe which groupings were chosen and why                                                                                 | 8       |
| Statistical methods          | 12      | (a) Describe all statistical methods, including those used to control for confounding                                                                                                                        | 8       |
|                              |         | (b) Describe any methods used to examine subgroups and interactions                                                                                                                                          | 8       |
|                              |         | (c) Explain how missing data were addressed                                                                                                                                                                  |         |
|                              |         | (d) If applicable, describe analytical methods taking account of sampling strategy                                                                                                                           |         |
|                              |         | (e) Describe any sensitivity analyses                                                                                                                                                                        | 8       |
| <b>Results</b>               |         |                                                                                                                                                                                                              |         |
| Participants                 | 13*     | (a) Report numbers of individuals at each stage of study—eg numbers potentially eligible, examined for eligibility, confirmed eligible, included in the study, completing follow-up, and analysed            | 7,8     |
|                              |         | (b) Give reasons for non-participation at each stage                                                                                                                                                         | NA      |
|                              |         | (c) Consider use of a flow diagram                                                                                                                                                                           | 8       |
| Descriptive data             | 14*     | (a) Give characteristics of study participants (eg demographic, clinical, social) and information on exposures and potential confounders                                                                     | NA      |
|                              |         | (b) Indicate number of participants with missing data for each variable of interest                                                                                                                          | NA      |
| Outcome data                 | 15*     | Report numbers of outcome events or summary measures                                                                                                                                                         | NA      |
| Main results                 | 16      | (a) Give unadjusted estimates and, if applicable, confounder-adjusted estimates and their precision (eg, 95% confidence interval). Make clear which confounders were adjusted for and why they were included | NA      |



|                          |    |                                                                                                                                                                            |       |
|--------------------------|----|----------------------------------------------------------------------------------------------------------------------------------------------------------------------------|-------|
|                          |    | (b) Report category boundaries when continuous variables were categorized                                                                                                  |       |
|                          |    | (c) If relevant, consider translating estimates of relative risk into absolute risk for a meaningful time period                                                           |       |
| Other analyses           | 17 | Report other analyses done—eg analyses of subgroups and interactions, and sensitivity analyses                                                                             | NA    |
| <b>Discussion</b>        |    |                                                                                                                                                                            |       |
| Key results              | 18 | Summarise key results with reference to study objectives                                                                                                                   | NA    |
| Limitations              | 19 | Discuss limitations of the study, taking into account sources of potential bias or imprecision. Discuss both direction and magnitude of any potential bias                 | 3, 10 |
| Interpretation           | 20 | Give a cautious overall interpretation of results considering objectives, limitations, multiplicity of analyses, results from similar studies, and other relevant evidence | NA    |
| Generalisability         | 21 | Discuss the generalisability (external validity) of the study results                                                                                                      | NA    |
| <b>Other information</b> |    |                                                                                                                                                                            |       |
| Funding                  | 22 | Give the source of funding and the role of the funders for the present study and, if applicable, for the original study on which the present article is based              | 10    |

\*Give information separately for exposed and unexposed groups.

**Note:** An Explanation and Elaboration article discusses each checklist item and gives methodological background and published examples of transparent reporting. The STROBE checklist is best used in conjunction with this article (freely available on the Web sites of PLoS Medicine at <http://www.plosmedicine.org/>, Annals of Internal Medicine at <http://www.annals.org/>, and Epidemiology at <http://www.epidem.com/>). Information on the STROBE Initiative is available at [www.strobe-statement.org](http://www.strobe-statement.org).
